# Supplementary material for: Birnessite-coated sand filled vertical flow constructed wetlands improved nutrients removal in a cold climate
Source: Royal Society of Chemistry journal article supplement (doi:10.1039/c9ra07364g), 2019-01-01
Supplement: c9ra07364g1.pdf [file c9ra07364g1.pdf]

## Supporting Information

**Journal name:** RSC Advances

**Title:** Birnessite-coated sand filled vertical flow constructed wetlands improved nutrients removal in cold climate

**Authors:** Ning Zhang<sup>a</sup>, Yixiao Yang<sup>a</sup>, Lihua Huang<sup>c</sup>, Huijun Xie<sup>a\*</sup>, Zhen Hu<sup>b</sup>

**Author affiliations:**

<sup>a</sup>*Environment Research Institute, Shandong University, Jinan 250100, China*

<sup>b</sup>*Shandong Key Laboratory of Water Pollution Control and Resource Reuse, School of Environmental Science and Engineering, Shandong University, Jinan, Shandong 250100, China*

<sup>c</sup>*School of Resources and Environment, Linyi University, Linyi, Shandong 276005, China*

\*Corresponding author: xiehuij@sdu.edu.cn (H. Xie) Tel: 0086-531-88361185, Fax: 0086-531-8836978

## **List of supporting information**

**Text S1** Method

**Table S1** Influent and effluent concentrations of NH<sub>4</sub>-N, NO<sub>3</sub>-N, TP, COD in Mn-CWs and Control during the winter

**Table S2** Comparison of microbial community abundance and diversity at 20 cm height of Mn-CWs and Control

**Table S3** The relative abundance of nitrifying and denitrifying bacteria at at 20 cm height of Mn-CWs and Control

**Fig. S1** Air temperature in winter.

**Fig. S2** The before (a) and after (b) SEM comparative figure of birnessite-coated sand. Scale bar in all images represents 5 μm.

**Fig. S3** Effluent concentrations of COD removal efficiency in the two CWs throughout the experiment period.

**Fig. S4** TIC chromatograms of volatile organic compounds (VOC) in sediment: (a) and (b) Chromatographic profiles of Mn-CWs and Control.

## **Method**

### **Chemicals**

The birnessite-coated sand is artificially synthesized. Specifically, 2 mol of potassium permanganate (158 g) was first dissolved in 2.5 L of water, and then 300 g of hydrochloric acid washed sand was added and heated to boiling. Next, 2 mol of concentrated hydrochloric acid (167 ml) was added dropwise to the solution and stirred all the time. After the addition, the boiling was continued for ten minutes. After cooling, the resulting precipitate was filtered and rinsed with deionized water. After drying, the synthesized birnessite-coated sand was obtained. Repeat the operation 10 times to get a sufficient amount to be used.

**Table S1** Influent and effluent concentrations of NH<sub>4</sub>-N, NO<sub>3</sub>-N, TP, COD in Mn-CWs and Control during the winter

| Systems  | Temperature (°C) | PH          | Conductivity | NH <sub>4</sub> -N (mg/L) | NO <sub>3</sub> -N (mg/L) | TN (mg/L)                | TP (mg/L)                | COD (mg/L)                |
|----------|------------------|-------------|--------------|---------------------------|---------------------------|--------------------------|--------------------------|---------------------------|
| Influent | 5.50 ± 1.70      | 7.85 ± 0.27 | 1327 ± 68    | 7.98 ± 0.39               | 11.67 ± 0.97              | 19.65 ± 0.65             | 0.95 ± 0.07              | 65.79 ± 7.35              |
| Mn-CWs   | 5.70 ± 2.20      | 8.17 ± 0.16 | 1395 ± 84    | 2.09 ± 1.43 <sup>b</sup>  | 1.09 ± 0.60 <sup>a</sup>  | 3.45 ± 1.61 <sup>b</sup> | 0.40 ± 0.29 <sup>b</sup> | 28.42 ± 6.68 <sup>b</sup> |
|          |                  |             |              | 73.81                     | 90.66                     | 82.44                    | 57.89                    | 56.80                     |
| Control  | 5.70 ± 1.80      | 8.36 ± 0.09 | 1311 ± 52    | 5.66 ± 0.61 <sup>a</sup>  | 1.12 ± 0.66 <sup>a</sup>  | 7.31 ± 1.16 <sup>a</sup> | 1.20 ± 0.71 <sup>a</sup> | 39.37 ± 7.35 <sup>a</sup> |
|          |                  |             |              | 29.07                     | 90.40                     | 62.80                    | -26.32                   | 40.16                     |

<sup>a and b</sup> means significant difference (P<0.05).

**Table S2** Comparison of microbial community abundance and diversity at 20 cm height of Mn-CWs and Control

| Samples    | OTUs | ACE       | Chao      | Shannon | Coverage(%) |
|------------|------|-----------|-----------|---------|-------------|
| Control-20 | 1199 | 1303.7005 | 1321.9179 | 5.1988  | 99.56       |
| Mn-20      | 1041 | 1139.5042 | 1153.1287 | 5.1298  | 99.64       |

**Table S3** The relative abundance of nitrifying and denitrifying bacteria at at 20 cm height of Mn-CWs and Control

| reabundance (%)       | Control-20 | Mn-20 |
|-----------------------|------------|-------|
| Nitrifying bacteria   | 19.87      | 37.07 |
| Denitrifying bacteria | 33.76      | 42.47 |

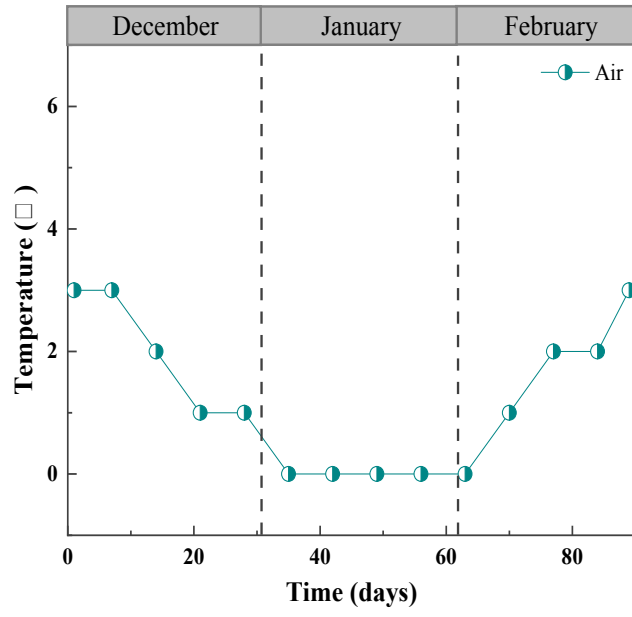

**Fig. S1** Air temperature in winter.

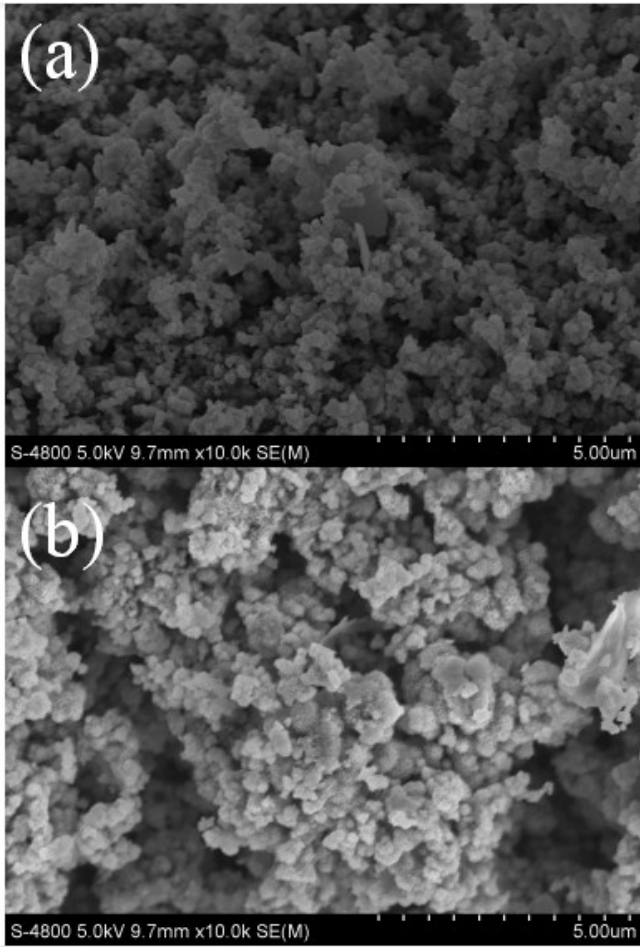

**Fig. S2** The before (a) and after (b) SEM comparative figure of birnessite-coated sand.

Scale bar in all images represents 5  $\mu\text{m}$ .



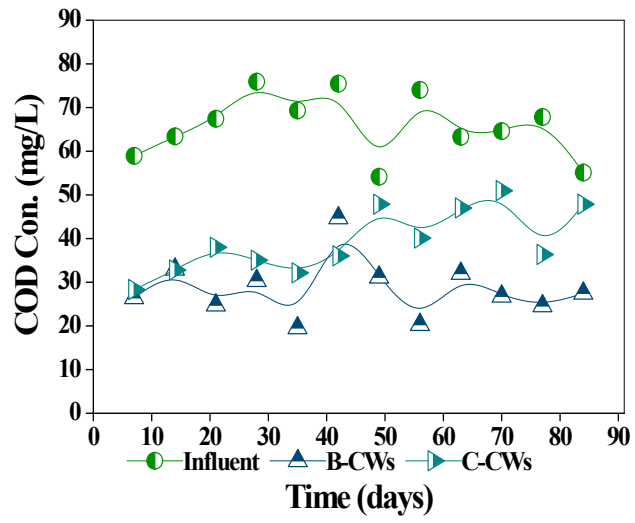

**Fig. S3** Effluent concentrations of COD removal efficiency in the two CWs throughout the experiment period.

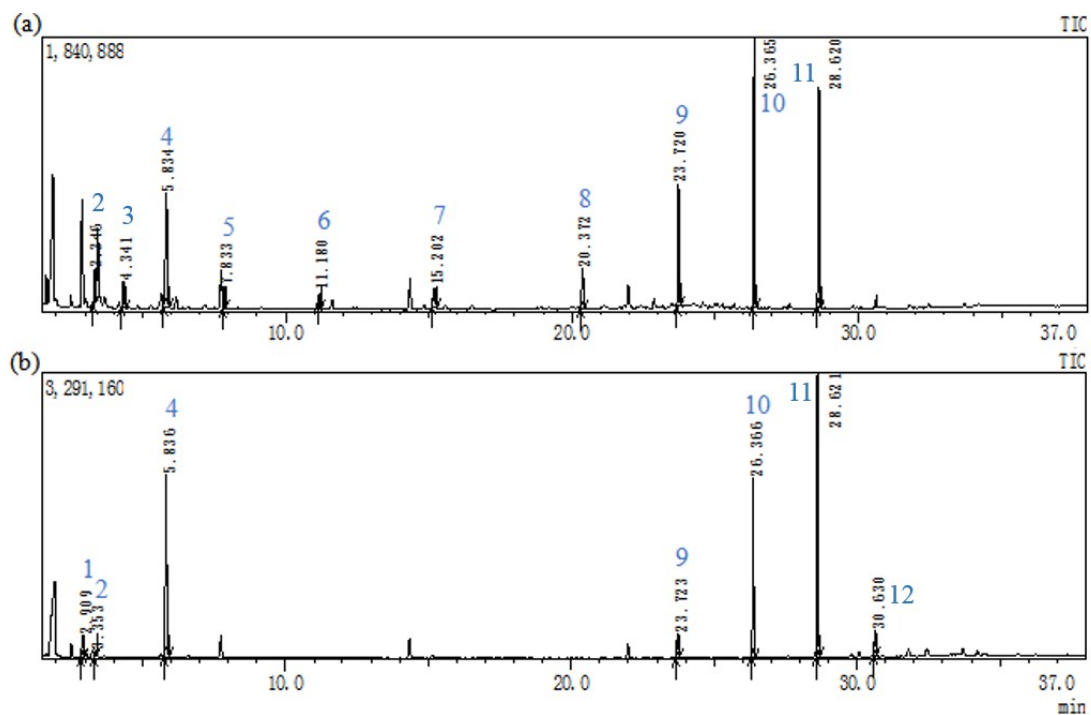

1. Acetoxy-2-methoxyethane; 2. Methyl acetate; 3. n-hexane; 4. Ethyl acetate; 5. Heptane; 6. Toluene; 7. o-xylene; 8. Decane; 9. Undecane; 10. Dodecane; 11. Tridecane; 12. Pentadecane

**Fig. S4** TIC chromatograms of volatile organic compounds (VOC) in sediment: (a) and (b) Chromatographic profiles of Mn-CWs and Control.
